# Supplementary material
Source: publisher site journal article supplement (https://www.dovepress.com/article/427183)
Supplement: Supplementary file 1 [file get_supplementary_file.php]

**Supplementary File 1**

***Inclusion criteria* (ad hoc translation from Danish)***

*The following inclusion criteria were sent to the recruiting general practitioners:*

Informants above the age of 18 years with more than one chronic diagnosis.

More specifically, Kristine wishes to interview patients who are suffering, reflective informants who experience problems in relation to their health status because of their multimorbidity.

The aspect of suffering might be expressed by one or more of the following:

The patients have one or more psychiatric diagnoses

And/or is under the age of 65 years

And/or is newly diagnosed with one of their chronic illnesses

And/or is poorly regulated in their treatment regimes

And/or has low compliance

And/or is anxious/neurotic

And/or is low educated

And/or has a limited social network

And/or feel neglected by the healthcare system

And/or feel limited physically or socially because of their illnesses

And/or feel unsafe in their everyday lives because of their health status

**Inclusion criteria as for the conceptual framework descriped in: Bissenbakker et al. (2022) Conceptualisation of a Measurement Framework for Needs-based Quality of Life among Patients with Multimorbidity. J Patient-Reported Outcomes*

**Supplementary File 2**

| **Content condensates of items in the first draft of MMQ (ad hoc translation from Danish)**  ***Inspired by content of existing Needs-based QoL measures and qualitative interviews**** | | |
| --- | --- | --- |
| *LCOPD* [34] | | |
|  | | Sparer på kræfterne [Saves one’s strength] # |
|  | | Ked af at kunne klare lidt [Upset about being able to do so little] + |
|  | | Bange på grund af sygdomme [Frightened because of illnesses] #  Nemt frustreret [Easily frustrated] %  Flov over begrænsninger [Embarrassed by limitations] #  Sygdomme påvirker selvtilliden [Illnesses affect the confidence] +  Begrænset mobilitet [Limited mobility] +  Ingen spontane aktiviteter [No spontaneous activities] #  Spærret inde i eget hjem [Trapped in one’s home] #  Sygdomme styrer livet [Illnesses controls life] %  Alt skal planlægges [Everything has to be planned] #  Afhængig af andre [Dependent on others] #  Kan ikke være væk hjemmefra [Cannot be away from home] %  Begrænset i fremtidsplaner [Prevented from planning far in advance] #  Sygdomme fylder [Illnesses take up a great deal] %  Kommer sjældent ud [Rarely gets out] %  Sygdomme dikterer [Illnesses dictates] #  Begrænser andre [Limits others] #  Vil ikke se nogen [Doesn’t want to see anyone] %  Sygdomme begrænser socialt samvær [Illnesses limits social gatherings] #  Forhold til de nærmeste belastet [Relationship with loved ones affected] + |
| *ALIS* [35] | | |
|  | | Presser sig selv [Push oneself] # |
|  | | Begrænset i at nå fulde potentiale [Hindered in reaching full potential] %  Bange for at blive set som doven [Afraid of being considered as lazy] %  Afhængig af medicin [Dependent on treatment] %  Planlægger hverdagen ud fra behandlinger [Plans everyday life from treatments] #  Skuffer andre [Disappoints others] %  Begrænset interesse i sex [Limited interest in sex] # |
| *QLDS* [18, 63] | | |
|  | | Forhindret i at sove godt [Prevented from sleeping well] % |
|  | | Begrænset i at udføre hverdagsaktiviteter [Hindered from doing everyday activities] # |
|  | | Begrænset i at opretholde personlig hygiejne [Hindered from maintaining my hygiene] # |
|  | | Begrænset i hobbyaktiviteter [Limited in doing usual hobbies] # |
| *CAMPHOR* | | |
|  | | Forhindret i at gå en tur for fornøjelsens skyld [Hindered from going for a walk just for pleasure] # |
|  | | Føler kroppen har svigtet [Feels as if the body has failed] %  Mistet rollen i livet [Lost the role in life] #  Bryder sig ikke om at blive set som syg [Dislikes being seen as ill] #  Mistet appetitten [Lost the appetite] %  Sygdomme altid i tankerne [Thinks about illnesses all the time] %  Føler sig sårbar alene [Feels vulnerable when alone] %  Dårlig samvittighed ved at bede om hjælp [Bad conscience when asking for help] # |
| *Qualitative project concerning multimorbidity and poor selfcare** | | |
|  | | Konstant træt [Constantly tired] +  Overkommer lidt [Manages very little]+ |
|  | | Bekymringer relateret til sygdomme [Worries related to illnesses] #  Nervøs for fremtiden [Nervous about the future] #  Bange for at gøre andre bekymret [Afraid of making others worried] # |
|  | | Prioriterer anderledes [Prioritises differently] %  Mangler en primær pårørende i det daglige [Lacks a primary relative in everyday life] # |
|  | LCOPD: Living with Chronic Obstructive Pulmonary Disease  ALIS: Asthma Life Impact Scale  QLDS: Quality of Life in Depression scale  CAMPHOR: Cambridge Pulmonary Hypertension Outcome Review  + Item included with original content  # Item modified and included  % Item excluded  *Transcribed interviews from a qualitative project concerning patients with multimorbidity and poor selfcare *(Kristensen MAT, Guassora AD, Arreskov AB, Waldorff FB, Hølge-Hazelton B. 'I've put diabetes completely on the shelf till the mental stuff is in place'. How patients with doctor-assessed impaired self-care perceive disease, self-care, and support from general practitioners. A qualitative study. Scand J Prim Health Care. 2018 Sep;36(3):342-351. doi: 10.1080/02813432.2018.1487436.)* | |

**Supplementary File 3**

| **Content condensates of items in the first draft of MMQ 2 (ad hoc translation from Danish)**  ***Inspired by ethnographical studies regarding Subjective health inequity*** | |
| --- | --- |
| *Feeling of injustice (when in contact with health professionals or local authorities):* | |
|  | Dårligere behandlet [Worse treated] # |
|  | Uretfærdigt bedømt [Unfairly judged] # |
|  | Uretfærdigt bedømt pga. jobsituation [Unfairly judged because of employment situation] #  Uretfærdigt bedømt pga. sociale position [Unfairly judged because of social position] %  Stemplet af andre [Labelled by others] #  Uretfærdigt bedømt pga. samfundets normer [Unfairly judged because of society’s norms] #  Uretfærdigt bedømt af kommunalt ansate pga. samfundets normer [Unfairly judged by local authorities because of society’s norms] #  Sat i bås [Pigeonholed as an inferior patient] %  Uretfærdigt bedømt som dårlig patient [Unfairly judged as an inferior patient] %  Sat i bås som andenrangsborger [Labelled as second-class citizen] #  # Item modified and included  % Item excluded |

**Supplementary File 4**

| **Content condensates of items and domains in the final draft of MMQ1 (ad hoc translation from Danish)** | |
| --- | --- |
| *Physical ability* | |
|  | Overkommer lidt [Manages very little]  Konstant træt [Constantly tired]  Opmærksom på kroppen [Aware of the body]  Svært at varetage kroppen [Difficulties taking care of body]  Ked af at kunne klare lidt [Upset about being able to do so little]  Ingen fysisk aktivitet for fornøjelsen [No physically activity for pleasure] |
|  | Begrænset i personlig hygiejne [Prevented from maintaining personal hygiene] |
|  | Begrænset i huslige aktiviteter [Prevented from domestic activities]  Presser sig selv [Push themselves]  Begrænset i at være aktiv [Prevented from being active] |
| *Worries* | |  |
|  | Bekymringer ift. sygdomme [Worries regarding illnesses]  Bekymringer ift. behandling [Worries regarding treatment]  Nervøs for fremtiden [Nervous about the future]  Bekymret for økonomi [Worried about finances]  Bekymret for fysisk formåen [Worried about physical ability]  Bekymret for status i samfundet [Worried about being looked down on]  Psykisk sårbar [Physically vulnerable]  Forhindret I psykisk velbefindende [Prevented from psychical well-being]  Presser sig selv mentalt [Push themselves]  Belaster mine nærmeste [Burden to my loved ones]  De nærmeste bekymret [Loved ones worried] |
| *Limitations in everyday life* | |
|  | Begrænset mobilitet [Limited mobility] |
|  | Begrænset i spontane aktiviteter [Prevented from spontaneous activities] |
|  | Spærret inde i eget hjem [Trapped at home] |
|  | Sygdomme påvirker, hvad der er muligt [Illnesses affect what is possible]  Nødt til at planlægge i god tid [Have to plan well in advance]  Nødt til at planlægge aktiviteter fra start til slut [Have to plan activities from end to end]  Hverdag planlagt ud fra sygdomme [Everyday life planned around illnesses]  Svært at planlægge ud i fremtiden [Difficult planning far in advance]  Afhængig af andre [Dependent on others]  Besvær med at udføre ens arbejde [Difficult performing one’s job]  Mangler nødvendig hjælp [Lack of necessary support]  Svært at holde ens hjem [Difficult keeping one’s home]  Svært at holde ens hjem, som man ønsker at præsentere det for andre [Difficult keeping one’s home as one wish to present it to others]  Svært at dyrke hobbyer [Difficult to pursue hobbies]  Begrænset overskud til at følge nyheder [Prevented from following what happens in the world] |
| *My social life* | |
|  | Begrænset i samvær med andre [Difficult to spend time with others]  Forhold til de nærmeste belastet [Relationship with loved ones affected] |
|  | Belastning for andre [Burden to others]  Mangler hjælp til at håndtere sygdomme [Need and lack support in managing illnesses]  Mangler pårørende til hjælp [Need and lack a close relative for support]  Begrænset i at få nye bekendtskaber [Prevented in establishing new relationships]  Svært ved at være noget for andre [Difficulties being anything to others]  Svært ved at støtte de nærmeste mentalt [Difficulties in being emotional support to my loved ones]  Svært ved at hjælpe de nærmeste [Difficulties helping loved ones]  Begrænset sexliv [Limited sex life]  Begrænset i seksuelle aktiviteter [Prevented from sexual activities] |
| *Self-image* | |
|  | Pinligt berørt over begrænsninger [Embarrassed by limitations]  Sygdomme påvirker selvtilliden [Illnesses affect the confidence] |
|  | Sygdomme nedsætter selvværd [Illnesses lower self-esteem]  Ubehageligt at blive set som syg [Unpleasant to be viewed as ill]  Føler sig sat i bås [Feel judged] |
|  | Bebrejder sig selv [Blame oneself]  Dårlig samvittighed over livsstil [Feel guilty about lifestyle]  Skjuler sygdomme [Hide illnesses]  Vred på sig selv pga. sygdomme [Angry at oneself because of illnesses]  Skuffet over en selv [Disappointed on oneself]  Mister sin rolle på arbejdsmarkedet [Losing one’s role related to employment situation]  Mister sin rolle i familien [Losing one’s role in the family] |
| *Personal finances* | |
|  | Begrænset i muligheden for god økonomi [Prevented from the possibility of having a good economy]  Begrænset i at leve som man har lyst til [Prevented from living as one wish to] |

**Supplementary File 5**

| **Content condensates of items and domains in the final draft of MMQ2 measuring Self-perceived inequity**  **(ad hoc translation from Danish)**  *How patients with multimorbidity perceive being met by their GP, staff at their GP’s surgery, health care professionals, staff at the local authorities and family, friends, and others* | |
| --- | --- |
| *Experiences of being stigmatized* | |
|  | Uretfærdigt stemplet pga. sygdomme [Unfairly labelled because of illnesses] |
|  | Uretfærdigt stemplet pga. jobsituation [Unfairly labelled because of employment situation] |
|  | Sat i bås pga. samfundets normer [Pigeonholed because of society’s norms]  Mistillid omkring at følge råd og vejledning [Doubts ability to follow advice and instructions]  Sat i bås som andenrangsborger [Labelled as a second-class citizen] |
| *Experiences of not being seen and heard* | |
|  | ”Ikke set” [“Not seen”] |
|  | ”Ikke hørt” [”Not heard”]  Dårligere behandlet [Treated worse]  Uretfærdigt behandlet [Unfairly treated] |
| *Experiences of insufficient understanding of the burden of disease* | |
|  | Sundhedspersonale har svært ved at forstå problemer og udfordringer [Health care professionals doesn’t fully understand difficulties]  Sundhedspersonale har svært ved at tage problemer og udfordringer alvorligt [Health care professionals don’t take difficulties seriously]  Sundhedspersonale har svært ved at anerkende problemer og udfordringer [Health care professionals have a hard time acknowledging difficulties] |
| *Experiences of powerlessness* | |
|  | Ubetydelig brik [Insignificant piece of a jigsaw] |
|  | Kæmper sin sag [Pleads ones case]  Magtesløshed [Powerlessness]  Nedværdiget [Looked down on]  Ydmyget [Humiliated] |
